# Supplementary material
Source: PubMed Central journal article supplement (PMC4573728)
Supplement: JB.00379-15_zjb999093769so1.pdf [file JB.00379-15_zjb999093769so1.pdf]

| CopN                                                                                                                         | Full Length                                                                       | N-terminus                                                                        | C-terminus                                                                        |   |
|------------------------------------------------------------------------------------------------------------------------------|-----------------------------------------------------------------------------------|-----------------------------------------------------------------------------------|-----------------------------------------------------------------------------------|---|
| SD-LMT                                                                                                                       |  |  |  |   |
| SD-HLMT<br>+XαGal                                                                                                            |  |  |  |   |
| <div style="border-left: 1px solid black; padding-left: 5px; display: inline-block;">           Scc4<br/>Scc1         </div> | —                                                                                 | +                                                                                 | +                                                                                 | + |
|                                                                                                                              | +                                                                                 | +                                                                                 | +                                                                                 | + |

Figure S1: The N- (aa, 1-201) and C- (aa, 202-422) terminus as well as full length CopN from *C. trachomatis*, serovar D, were cloned into pGADT7 plasmid. The chlamydial T3S chaperones Scc4 and Scc1 were cloned into the pBRIDGE™ plasmid. Both plasmids were transferred into the yeast host and grown on synthetic amino acid dropout media (SD) lacking leucine, methionine and tryptophan (top row). Growth indicates the presence of both plasmids. The bottom row demonstrates the transformed *Saccharomyces cerevisiae*, Y2HGold, growing on SD media lacking leucine, methionine, tryptophan, histidine and supplemented with  $\alpha$ -Gal substrate. Blue colonies indicate an interaction between the protein produced from the pGADT7 plasmid and the proteins produced by the pBRIDGE™ plasmid (bottom row).

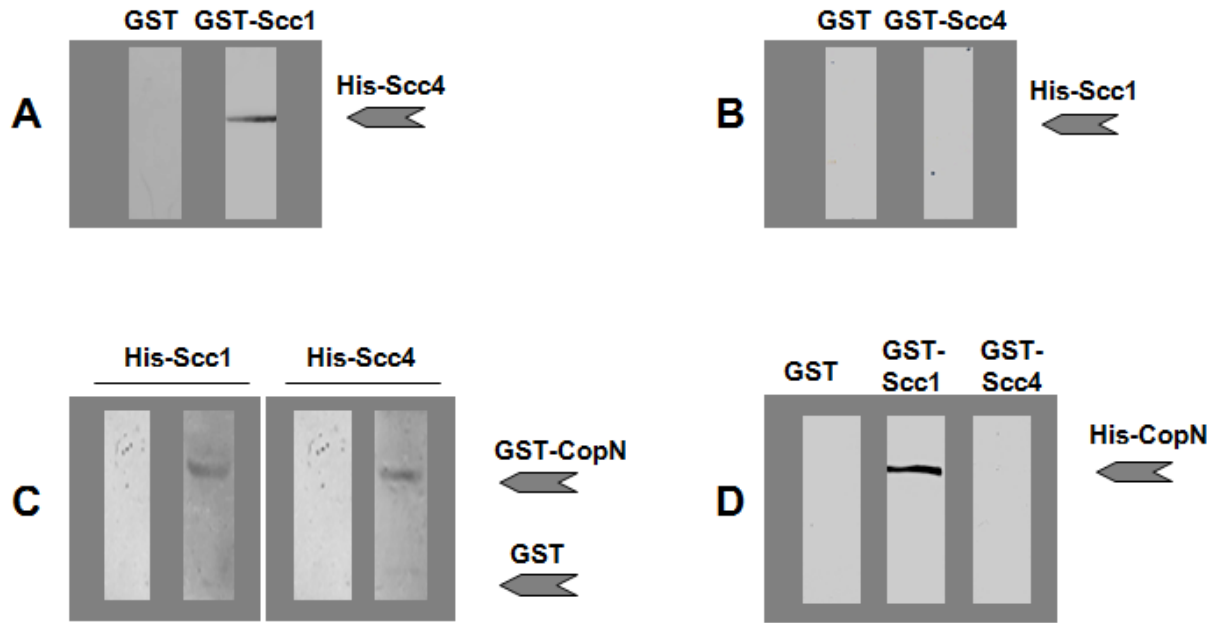

Figure S2: Pull-down assays showing the protein-protein interaction for GST- and 6x-His tagged recombinant Scc1, Scc4 and CopN. Glutathione agarose beads loaded with recombinant GST protein (Panels A, B and D) and recombinant GST protein alone (Panel C) served as controls for non-specific binding. Anti-6x-His-Scc4 (Panel A), anti-6x-His-Scc1 (Panel B), anti-GST- CopN (Panel C) and anti-6x-His-CopN (Panel D) mouse polyclonal sera were used to detect the target proteins.

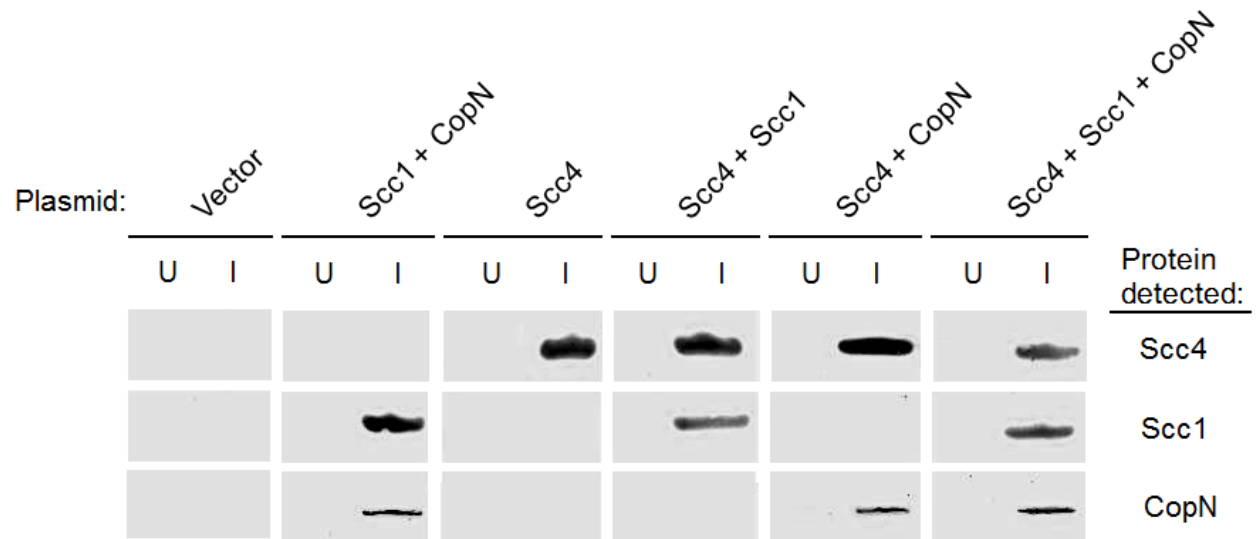

Figure S3: Western blots verifying expression in *E. coli* of Scc4, Scc1, and CopN after 4 h of induction, in various combinations, from an expression plasmid. The top row was probed with mouse polyclonal anti-His-Scc4, the middle row with mouse polyclonal anti-His-Scc1 and the bottom row with mouse polyclonal anti-His-CopN. (U) uninduced, (I) induced with 0.1 mM IPTG.

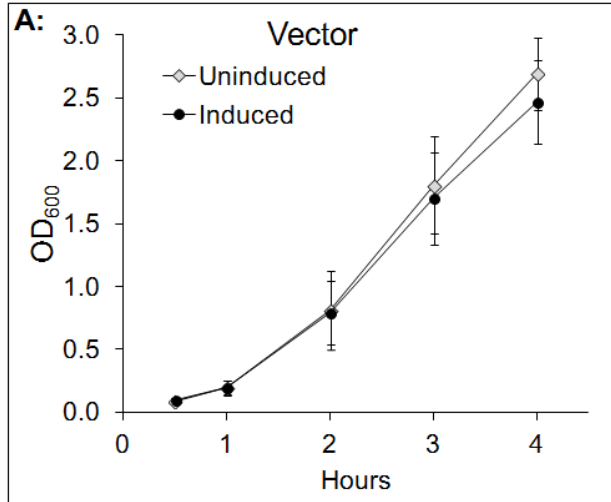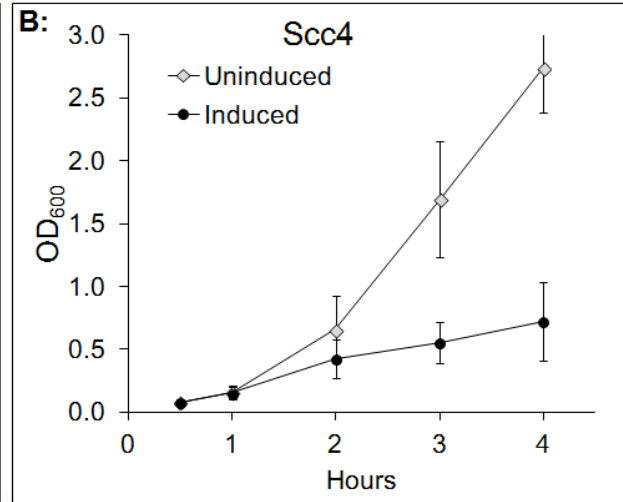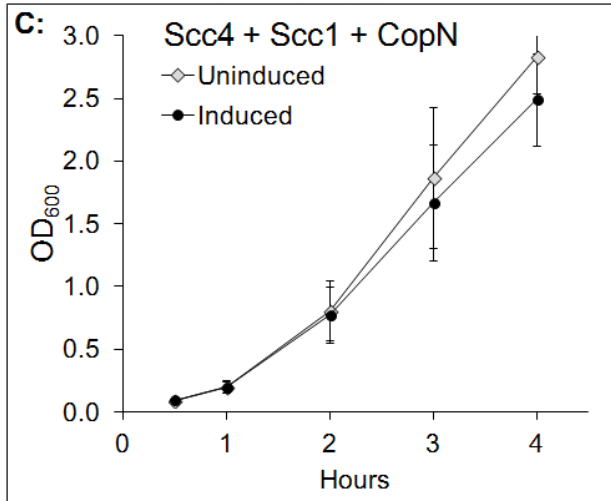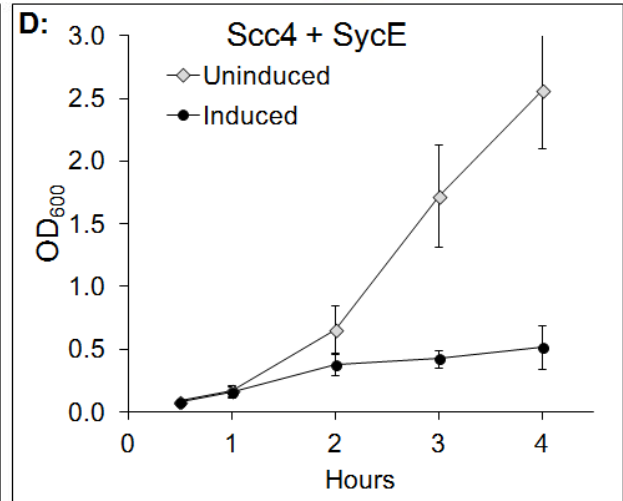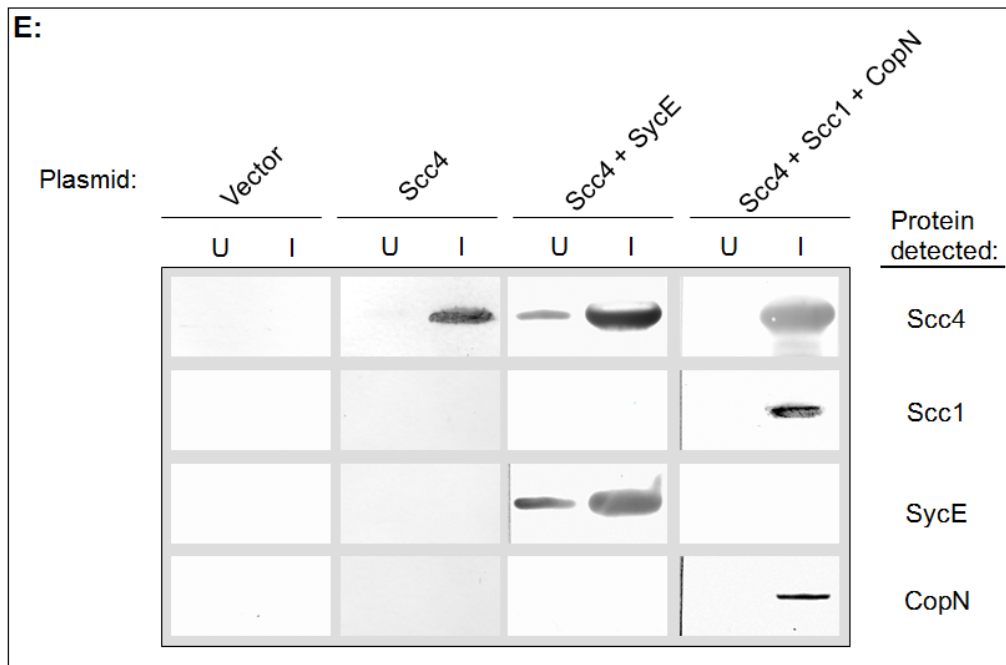

Figure S4: Control experiments examining whether the growth inhibition of *C. trachomatis* Scc4 could be reversed by co-expression with the non-interacting protein *Yersinia* SycE. Each graph shows the growth curve in the absence (Uninduced) or presence of IPTG (Induced), with the x-axis showing time after addition of IPTG to the induced sample. (A) Empty vector plasmid, (B) Scc4 alone, showing growth defect, (C) Scc4, Scc1, and CopN, showing antagonism of Scc4 growth defect, and (D) Scc4 and *Yersinia* SycE. (E) Western blots verifying expression of Scc4, Scc1, CopN, and *Yersinia* SycE from *E. coli* growth curves after 4 h of induction. The top row was probed with mouse polyclonal anti-His-Scc4, the second row with mouse polyclonal anti-His-Scc1, the third row with rabbit polyclonal anti-SycE, and the bottom row with mouse polyclonal anti-His-CopN. (U) uninduced, (I) induced with 0.1 mM IPTG.

Supplemental Table 1: Cloning vectors and recombinant plasmids used in this study.

| Plasmid                                  | Properties                                                                                                                                                                                                                                                                  | Source     |
|------------------------------------------|-----------------------------------------------------------------------------------------------------------------------------------------------------------------------------------------------------------------------------------------------------------------------------|------------|
| pET45b+                                  | Ap <sup>r</sup> ; expression vector for creation of N-terminal His <sub>6</sub> -containing recombinant proteins                                                                                                                                                            | Novagen    |
| pET45b+<br>CT088                         | Ap <sup>r</sup> ; PCR-amplified <i>C. trachomatis scc1</i> (CT088; 441 nt) fused in frame with an N-terminal His <sub>6</sub> -tag                                                                                                                                          | This study |
| pET45b+<br>CT089                         | Ap <sup>r</sup> ; PCR-amplified <i>C. trachomatis copN</i> (CopN; 1,263 nt) fused in frame with an N-terminal His <sub>6</sub> -tag                                                                                                                                         | This study |
| pET45b+<br>CT663                         | Ap <sup>r</sup> ; PCR-amplified <i>C. trachomatis scc4</i> (CT663; 402 nt) fused in frame with an N-terminal His <sub>6</sub> -tag                                                                                                                                          | This study |
| pGADT7                                   | Ap <sup>r</sup> ; <i>LEU2</i> ; cloning vector for expression of a cloned “prey” protein that is fused to GAL4 activation domain (AA)                                                                                                                                       | Clontech   |
| pBridge                                  | Kan <sup>r</sup> ; <i>TRP1</i> ; cloning vector for expression of a two cloned “bait” proteins. Main bait protein cloned in MCS1 and fused to GAL-4 DNA-Binding Domain (BD) and “bridge protein” that cloned in MCSII, conditionally expressed in methionine depleted media | Clontech   |
| pGADT7-<br>CT089-4                       | Ap <sup>r</sup> ; <i>LEU2</i> ; PCR-amplified <i>C. trachomatis copN</i> (CT089; 1266 nt) in pGADT7 vector N-terminal AD is fused in frame with full length CopN                                                                                                            | This study |
| pGADT7N-<br>CT089-2                      | Ap <sup>r</sup> ; <i>LEU2</i> ; PCR-amplified <i>C. trachomatis copN</i> (CT089; 1-603 nt, coding for N-terminus) in pGADT7 vector N-terminal AD is fused in frame with N-terminus of CopN                                                                                  | This study |
| HCpGADT7C-<br>CT089                      | Ap <sup>r</sup> ; <i>LEU2</i> ; PCR-amplified <i>C. trachomatis copN</i> (CT089; 604-1266 nt, coding for C-terminus) in pGADT7 vector N-terminal AD is fused in frame with C-terminus of CopN                                                                               | This study |
| pBridgeMSC1-<br>CT088-3                  | Kan <sup>r</sup> ; <i>TRP1</i> ; PCR-amplified <i>C. trachomatis scc1</i> (CT088, 441nt), vector for expression of “bait” protein fused to GAL-4 DNA-Binding Domain (BD)                                                                                                    | This study |
| pBridgeMSC1-<br>CT663-2                  | Kan <sup>r</sup> ; <i>TRP1</i> ; PCR-amplified <i>C. trachomatis scc4</i> (CT663, 402 nt), vector for expression of “bait” protein fused to GAL-4 DNA-Binding Domain (BD)                                                                                                   | This study |
| pBridgeMSC1-<br>CT862                    | Kan <sup>r</sup> ; <i>TRP1</i> ; PCR-amplified <i>C. trachomatis scc3</i> (CT862, 597nt), vector for expression of “bait” protein fused to GAL-4 DNA-Binding Domain (BD)                                                                                                    | This study |
| pBridgeMSC1-<br>CT663-1-MCS2-<br>CT088-2 | Kan <sup>r</sup> ; <i>TRP1</i> ; PCR-amplified gene coding for <i>C. trachomatis scc4</i> (CT663, 402nt) in MCS1, fused in frame with GAL-4 DNA-Binding Domain (BD) and PCR-amplified <i>C. trachomatis scc1</i> (CT088, 441nt) in MCS2 as a “bridge” protein.              | This study |
| pBridgeMSC1-<br>CT088-3-MCS2-<br>CT663-1 | Kan <sup>r</sup> ; <i>TRP1</i> ; PCR-amplified <i>C. trachomatis scc1</i> (CT088, 441nt) in MCS1, fused in frame with GAL-4 DNA-Binding Domain (BD) and gene coding for <i>C. trachomatis scc4</i> (CT663, 402nt) in MCS2 as a “bridge” protein.                            | This study |
| pBridgeMSC1-<br>CT663-1-MCS2-            | Kan <sup>r</sup> ; <i>TRP1</i> ; PCR-amplified gene coding for <i>scc4</i> (CT663, 402nt) in MCS1, fused in frame with GAL-4 DNA-Binding Domain (BD) and                                                                                                                    | This study |

|                                     |                                                                                                                                                                                                                                               |                     |
|-------------------------------------|-----------------------------------------------------------------------------------------------------------------------------------------------------------------------------------------------------------------------------------------------|---------------------|
| YersSycE-2                          | PCR-amplified <i>Yersinia pseudotuberculosis sycE</i> in MCS2 as a “bridge” protein.                                                                                                                                                          |                     |
| pBridgeMSC1-CT088-3-MCS2-YersSycE-2 | Kan <sup>r</sup> ; <i>TRP1</i> ; PCR-amplified gene coding for <i>scc4</i> (CT663, 402nt) in MCS1, fused in frame with GAL-4 DNA-Binding Domain (BD) and PCR-amplified <i>Yersinia pseudotuberculosis sycE</i> in MCS2 as a “bridge” protein. | This study          |
| pST44                               | Ap <sup>r</sup> ; Polycistronic expression system for coexpression of multicomponent protein complexes                                                                                                                                        | Selleck and Tan (1) |
| pMT1649                             | Ap <sup>r</sup> ; PCR-amplified <i>C. trachomatis scc4</i> fused in frame to pST44                                                                                                                                                            | This study          |
| pMT1652                             | Ap <sup>r</sup> ; PCR-amplified <i>C. trachomatis scc4</i> and <i>scc1</i> fused in frame to pST44                                                                                                                                            | This study          |
| pMT1653                             | Ap <sup>r</sup> ; PCR-amplified <i>C. trachomatis scc4</i> and <i>copN</i> fused in frame to pST44                                                                                                                                            | This study          |
| pMT1654                             | Ap <sup>r</sup> ; PCR-amplified <i>C. trachomatis scc1</i> and <i>copN</i> fused in frame to pST44                                                                                                                                            | This study          |
| pMT1655                             | Ap <sup>r</sup> ; PCR-amplified <i>C. trachomatis scc4</i> , <i>scc1</i> , and <i>copN</i> fused in frame to pST44                                                                                                                            | This study          |
| pMT1668                             | Ap <sup>r</sup> ; PCR-amplified <i>C. trachomatis scc4</i> and <i>Y. pseudotuberculosis sycE</i> fused in frame to pST44                                                                                                                      | This study          |

1. **Selleck, W., and S. Tan.** 2008. Recombinant protein complex expression in *E. coli*. *Curr Protoc Protein Sci* **Chapter 5**:Unit 5 21.
